# Supplementary material
Source: PubMed Central journal article supplement (PMC9226057)
Supplement: 41598_2022_14572_MOESM1_ESM.pdf [file 41598_2022_14572_MOESM1_ESM.pdf]

Psychological resources and flexibility predict resilient mental  
health trajectories during the French covid-19 lockdown :  
Supplementary Figures and Tables

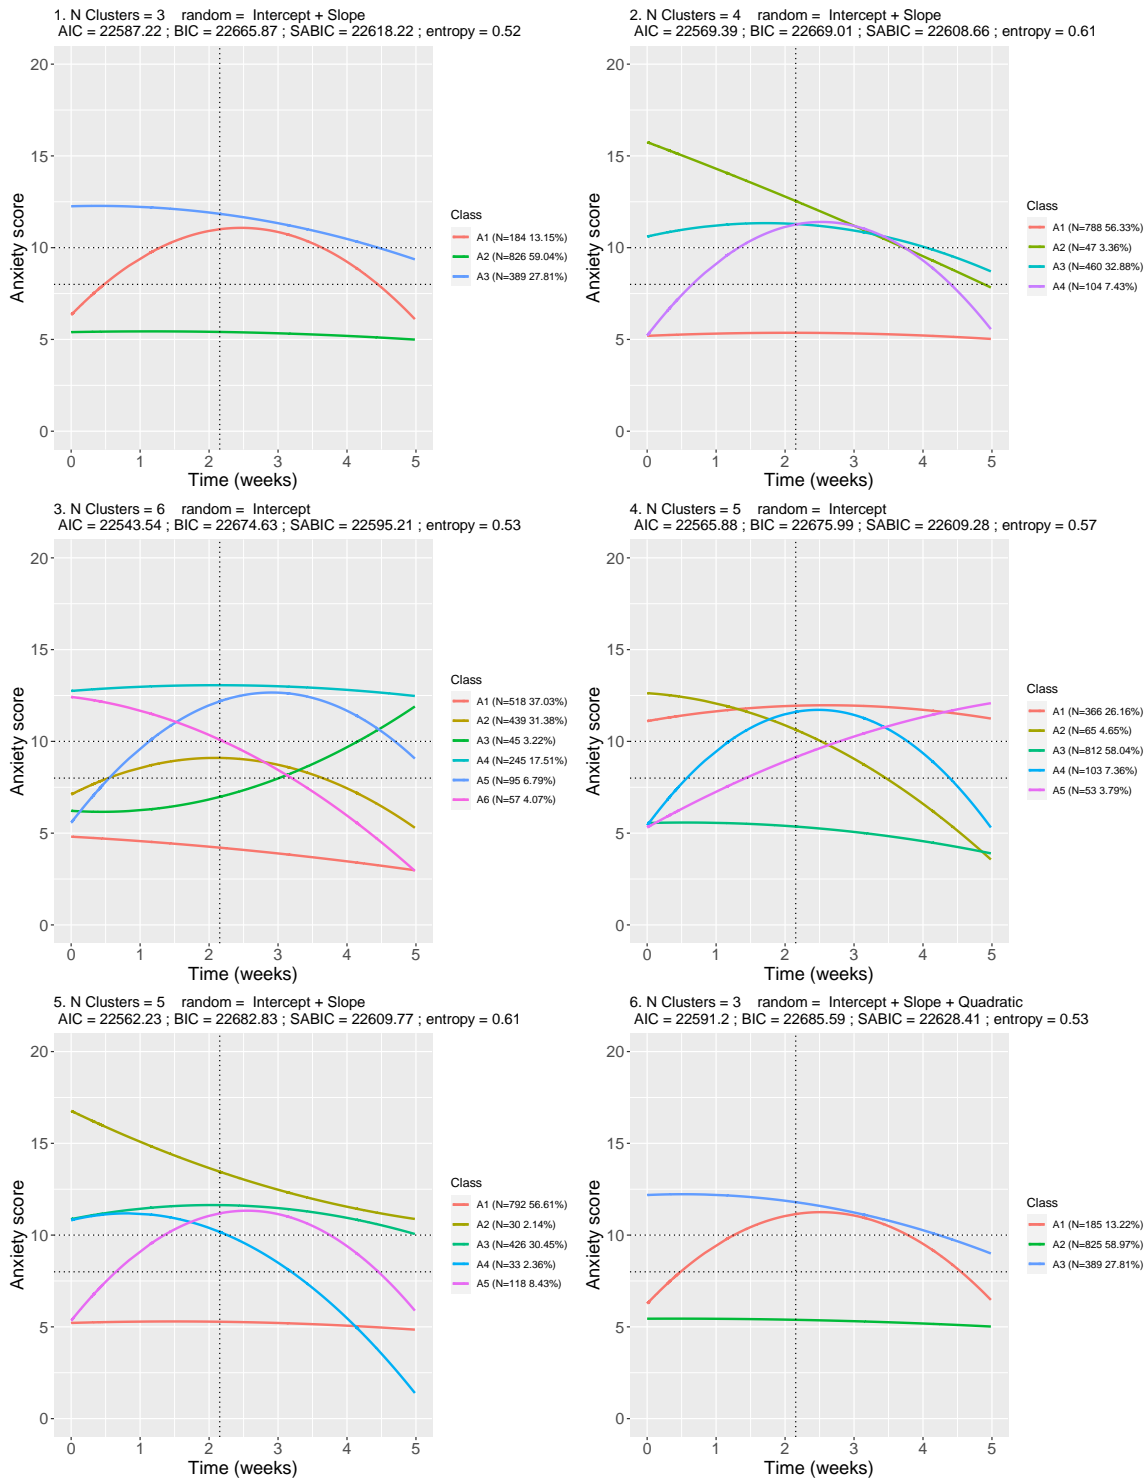

Figure S1. Predicted trajectories from the six best growth mixture model of depression ranked by BIC. Dashed horizontal lines represent symptomatic thresholds for depression (i.e., 8 and 10). The dashed vertical line depicts the moment lockdown happened.

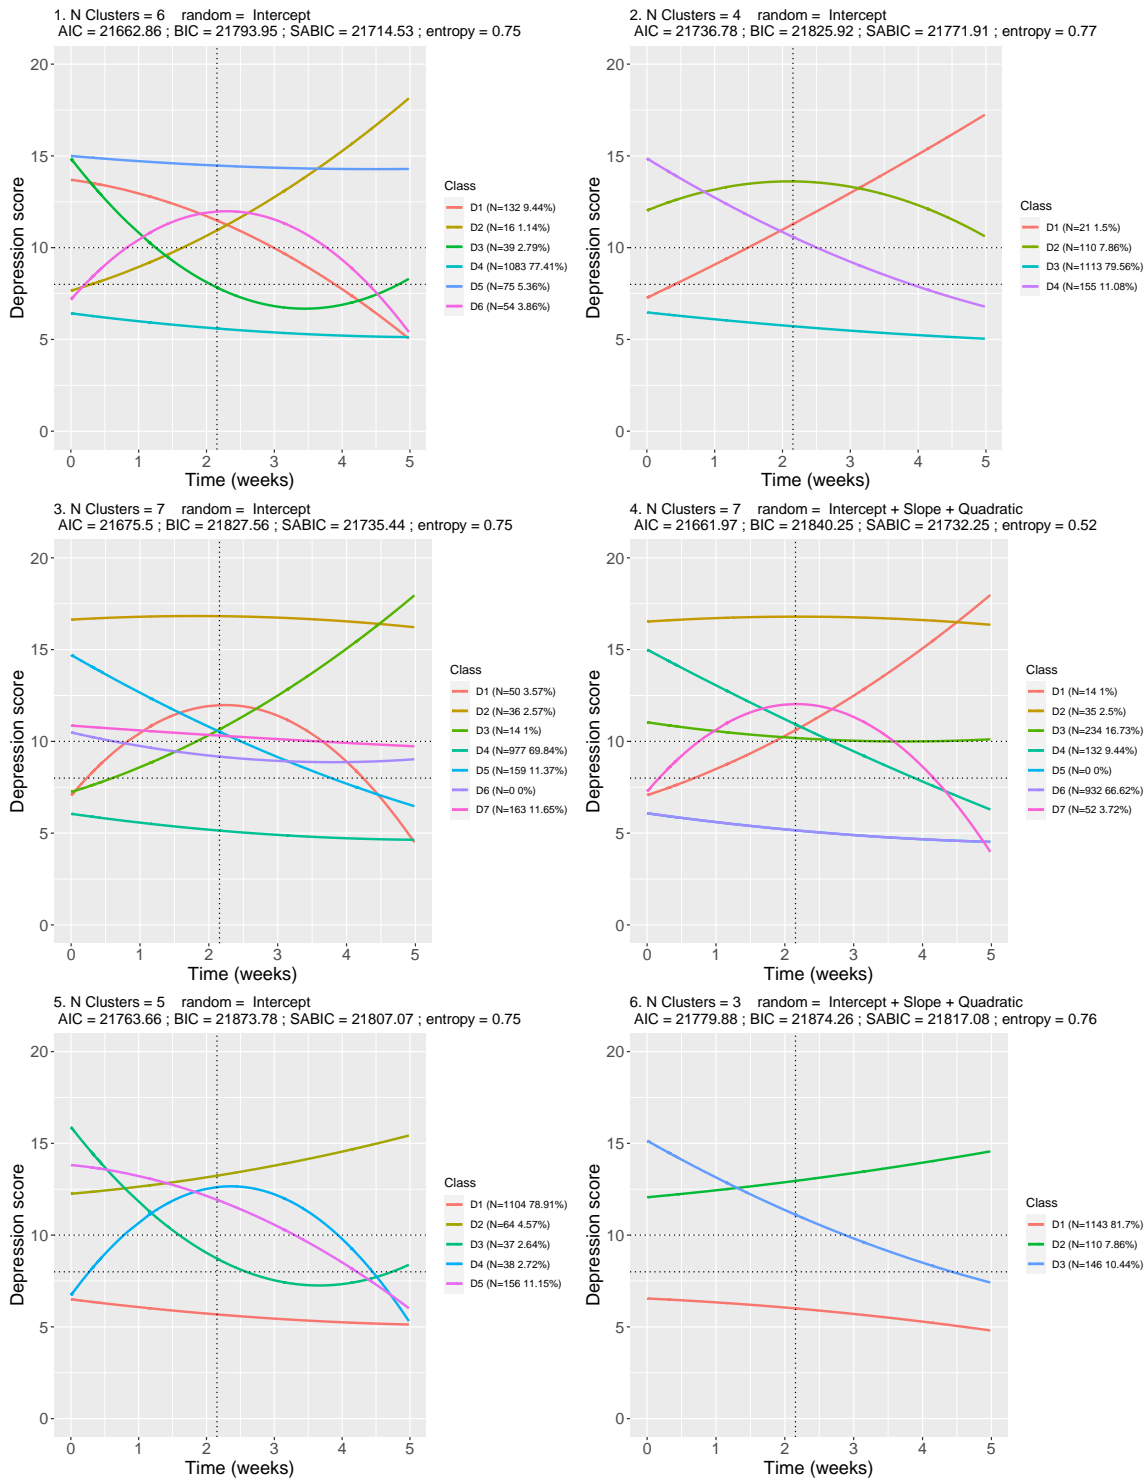

Figure S2. Predicted trajectories from the six best growth mixture model of anxiety ranked by BIC. Dashed horizontal lines represent symptomatic thresholds for anxiety (i.e., 8 and 10). The dashed vertical line depicts the moment of unlockdown.

Table S1

*Results of the linear regression model with psychological flexibility (AAQII) being predicted by psychological resources.*

| Predictor              | <i>b</i> | 95% CI         | <i>t</i> (1390) | <i>p</i> |
|------------------------|----------|----------------|-----------------|----------|
| Intercept              | -0.34    | [-0.65, -0.03] | -2.18           | .029     |
| Gratitude-world        | 0.04     | [-0.01, 0.09]  | 1.62            | .105     |
| Self-Transcendence     | -0.11    | [-0.15, -0.07] | -5.07           | < .001   |
| Wisdom                 | 0.51     | [0.45, 0.58]   | 15.84           | < .001   |
| Optimism               | 0.04     | [0.00, 0.08]   | 1.94            | .053     |
| Self-efficacy          | 0.08     | [0.03, 0.13]   | 3.41            | .001     |
| Hope                   | 0.20     | [0.15, 0.25]   | 7.90            | < .001   |
| Gratitude-being        | 0.08     | [0.04, 0.12]   | 3.50            | < .001   |
| Peaceful disengagement | 0.13     | [0.09, 0.18]   | 5.80            | < .001   |

Table S2

*Results of the linear regression model with psychological inflexibility (AFQ) being predicted by psychological resources.*

| Predictor              | <i>b</i> | 95% CI         | <i>t</i> (1389) | <i>p</i> |
|------------------------|----------|----------------|-----------------|----------|
| Intercept              | 4.94     | [4.69, 5.19]   | 38.77           | < .001   |
| Gratitude-world        | -0.05    | [-0.09, -0.01] | -2.28           | .023     |
| Self-Transcendence     | 0.09     | [0.06, 0.13]   | 5.34            | < .001   |
| Wisdom                 | -0.47    | [-0.52, -0.42] | -17.91          | < .001   |
| Optimism               | -0.02    | [-0.05, 0.02]  | -0.92           | .356     |
| Self-efficacy          | -0.01    | [-0.04, 0.03]  | -0.31           | .754     |
| Hope                   | -0.12    | [-0.16, -0.08] | -5.64           | < .001   |
| Gratitude-being        | 0.01     | [-0.03, 0.04]  | 0.34            | .732     |
| Peaceful disengagement | -0.10    | [-0.13, -0.06] | -5.21           | < .001   |
